# Supplementary figures and images for: Deep learning model predicts water interaction sites on the surface of proteins using limited-resolution data
Source: Royal Society of Chemistry journal article supplement (doi:10.1039/d0cc04383d), 2020-01-01

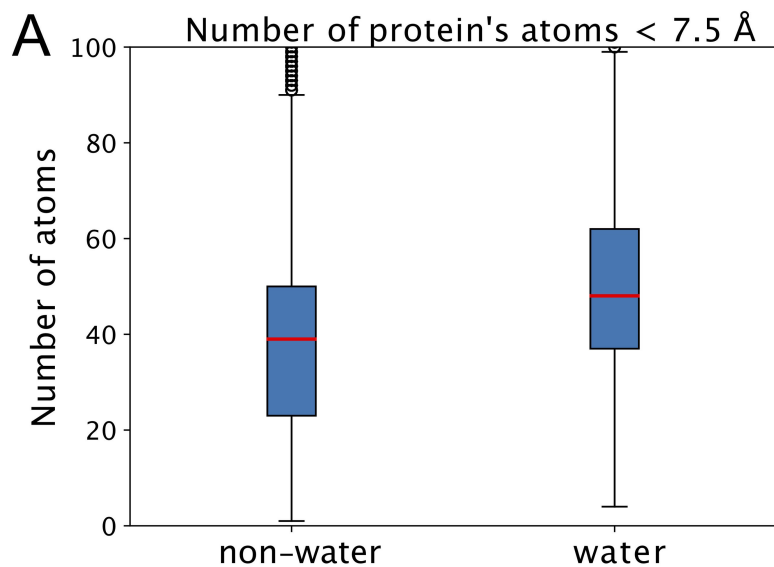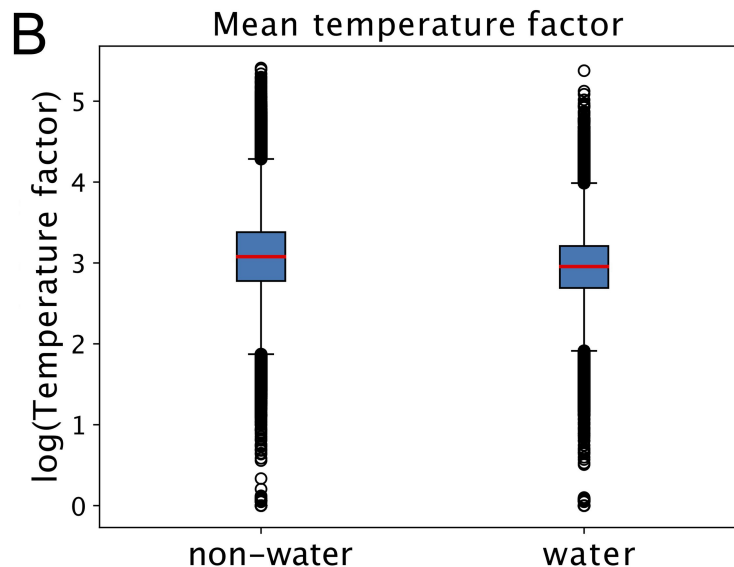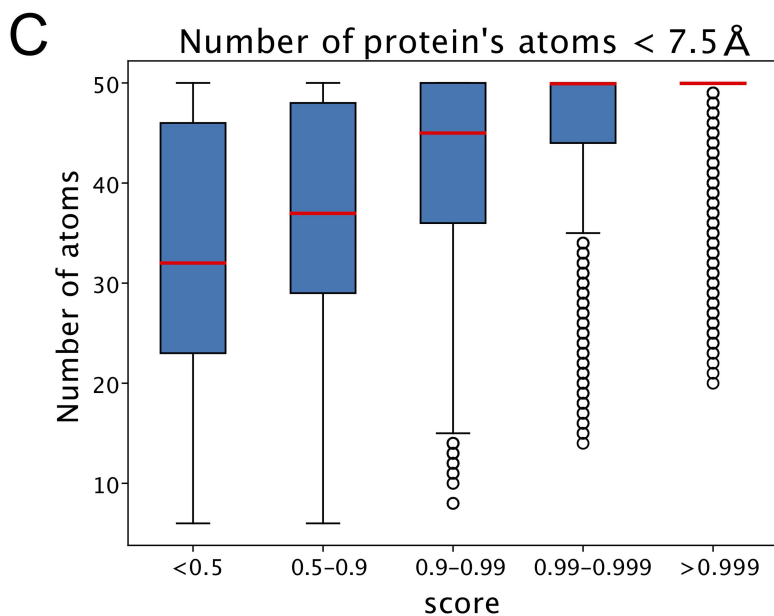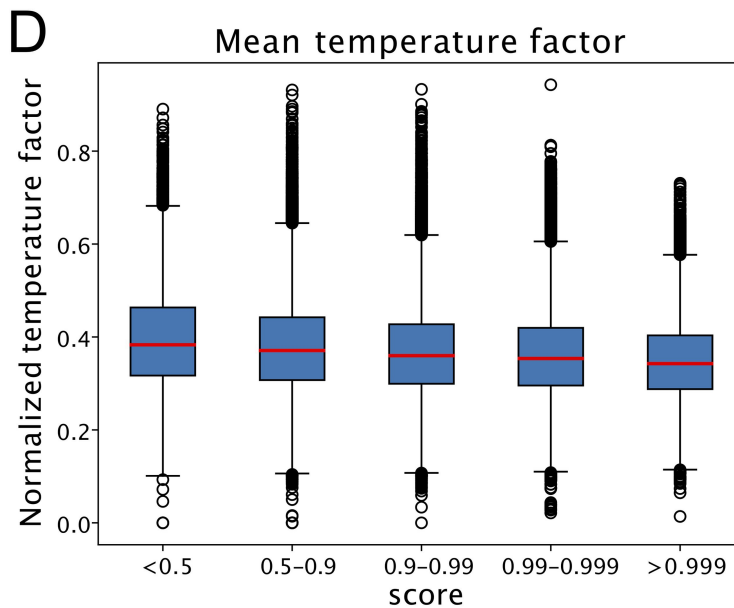

Supplement: d0cc04383d3.pdf [file d0cc04383d3.pdf]

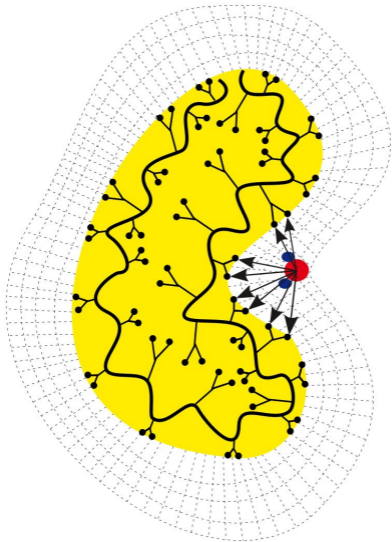

Supplement: d0cc04383d5.pdf [file d0cc04383d5.pdf]
